# Supplementary material for: Prevalence and global estimates of unsafe listening practices in adolescents and young adults: a systematic review and meta-analysis
Source: PubMed Central journal article supplement — BMJ Glob Health. 2022 Oct 27;7(11):e010501. doi: 10.1136/bmjgh-2022-010501 (PMC9723884; doi:10.1136/bmjgh-2022-010501), 2022-10-27
Supplement: bmjgh-2022-010501supp001.pdf [file bmjgh-2022-010501supp001.pdf]

Supplement 1: Search strings for each database. Searches were conducted December 16, 2021.

### Search string 1: Personal listening devices

#### **1. PubMed**

Advanced search

n= 92

Filters: English, years 2000-2021

("sound" OR "listen\*" OR "noise" OR "decibel level") AND ("risk" OR "odds" OR "prevalence" OR "incidence" OR "exposure") AND ("adolescent\*" OR "youth\*" OR "young adult\*" OR "student\*" OR "juvenile\*" OR "teenage\*") AND ("audio device" OR "personal listening device" OR "mp3 player" OR "Ipod" OR "personal music devices" OR "music player")

#### **2. Web of Science core collection**

Advanced search

n= 80

Filters: English, years 2000-2021

("sound" OR "listen\*" OR "noise" OR "decibel level") AND ("risk" OR "odds" OR "prevalence" OR "incidence" OR "exposure") AND ("adolescent\*" OR "youth\*" OR "young adult\*" OR "student\*" OR "juvenile\*" OR "teenage\*") AND ("audio device" OR "personal listening device" OR "mp3 player" OR "Ipod" OR "personal music devices" OR "music player")

#### **3. Scopus**

Advanced search

n=198

Filters: English, years 2000-2021

TITLE-ABS-KEY ( ( "sound" OR "listen\*" OR "noise" OR "decibel level" ) AND ( "audio device" OR "personal listening device" OR "mp3 player" OR "Ipod" OR "personal music devices" OR "music player" ) AND ( "risk" OR "odds" OR "prevalence" OR "incidence" OR "exposure" ) ) AND ALL ( ( "adolescent\*" OR "youth\*" OR "young adult\*" OR "student\*" OR "juvenile\*" OR "teenage\*" ) )

### Search string 2: Entertainment venues

#### **1. PubMed**

Advanced search

n= 61

Filters: English, years 2000-2021

("sound" OR "listen\*" OR "noise" OR "decibel level") AND ("risk" OR "odds" OR "prevalence" OR "incidence" OR "exposure") AND ("adolescent\*" OR "youth\*" OR "young adult\*" OR "student\*" OR "juvenile\*" OR "teenage\*") AND ("entertainment venue\*" OR "night club" OR "concert" OR "discotheque\*" OR "bar" OR "disco" OR "nightclub")

## 2. Web of Science core collection

Advanced search

n= 71

Filters: English, years 2000-2021

("sound" OR "listen\*" OR "noise" OR "decibel level") AND ("risk" OR "odds" OR "prevalence" OR "incidence" OR "exposure") AND ("adolescent\*" OR "youth\*" OR "young adult\*" OR "student\*" OR "juvenile\*" OR "teenage\*") AND ("entertainment venue\*" OR "night club" OR "concert" OR "discotheque\*" OR "bar" OR "disco" OR "nightclub")

## 3. Scopus

Advanced search

n= 167

Filters: English, years 2000-2021

TITLE-ABS-KEY ( ( "sound" OR "listen\*" OR "noise" OR "decibel level" ) AND ("entertainment venue\*" OR "night club" OR "concert" OR "discotheque\*" OR "bar" OR "disco" OR "nightclub") AND ( "risk" OR "odds" OR "prevalence" OR "incidence" OR "exposure" ) ) AND ALL ( ( "adolescent\*" OR "youth\*" OR "young adult\*" OR "student\*" OR "juvenile\*" OR "teenage\*" ) )
