# Supplementary material for: Prevalence and global estimates of unsafe listening practices in adolescents and young adults: a systematic review and meta-analysis
Source: PubMed Central journal article supplement — BMJ Glob Health. 2022 Oct 27;7(11):e010501. doi: 10.1136/bmjgh-2022-010501 (PMC9723884; doi:10.1136/bmjgh-2022-010501), 2022-10-27
Supplement: bmjgh-2022-010501supp002.pdf [file bmjgh-2022-010501supp002.pdf]

Supplementary Materials 2. Details for risk of bias assessment.

**Personal Listening Devices**

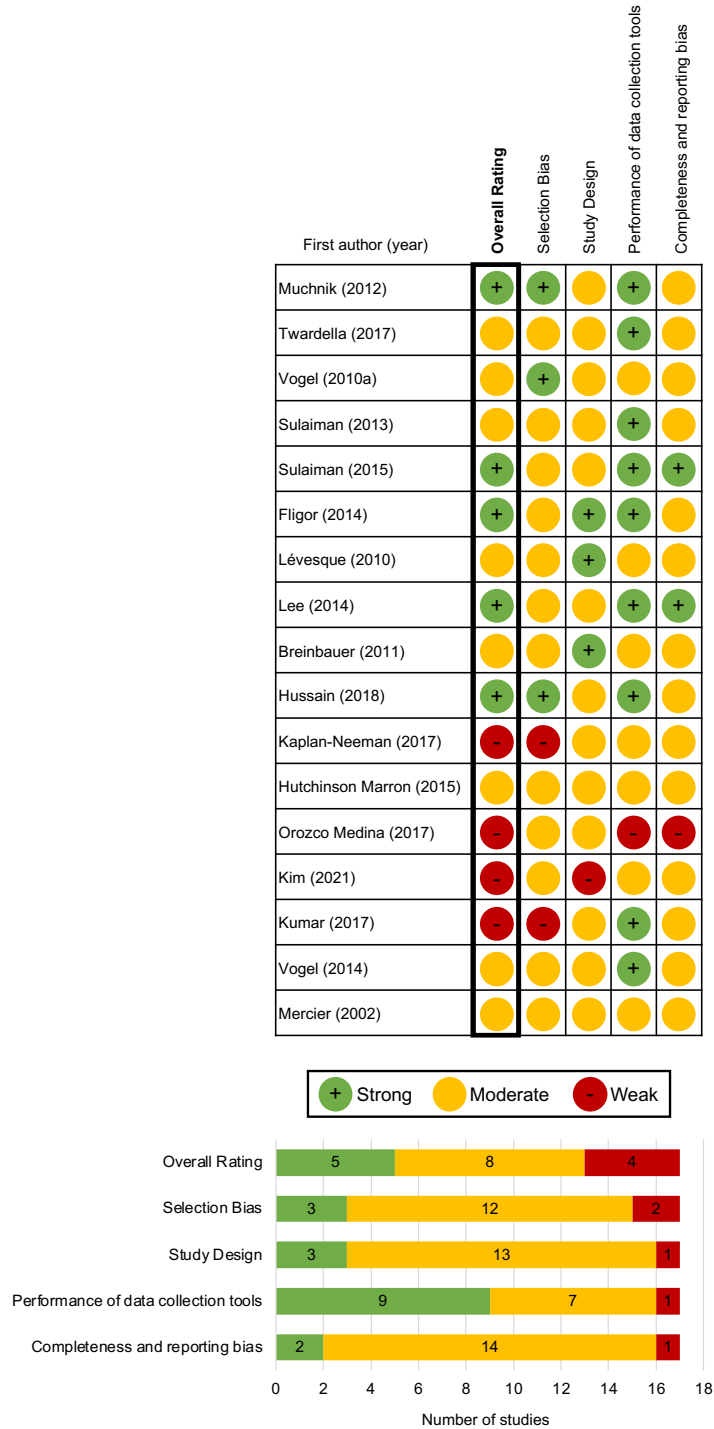

### Loud Entertainment Venues

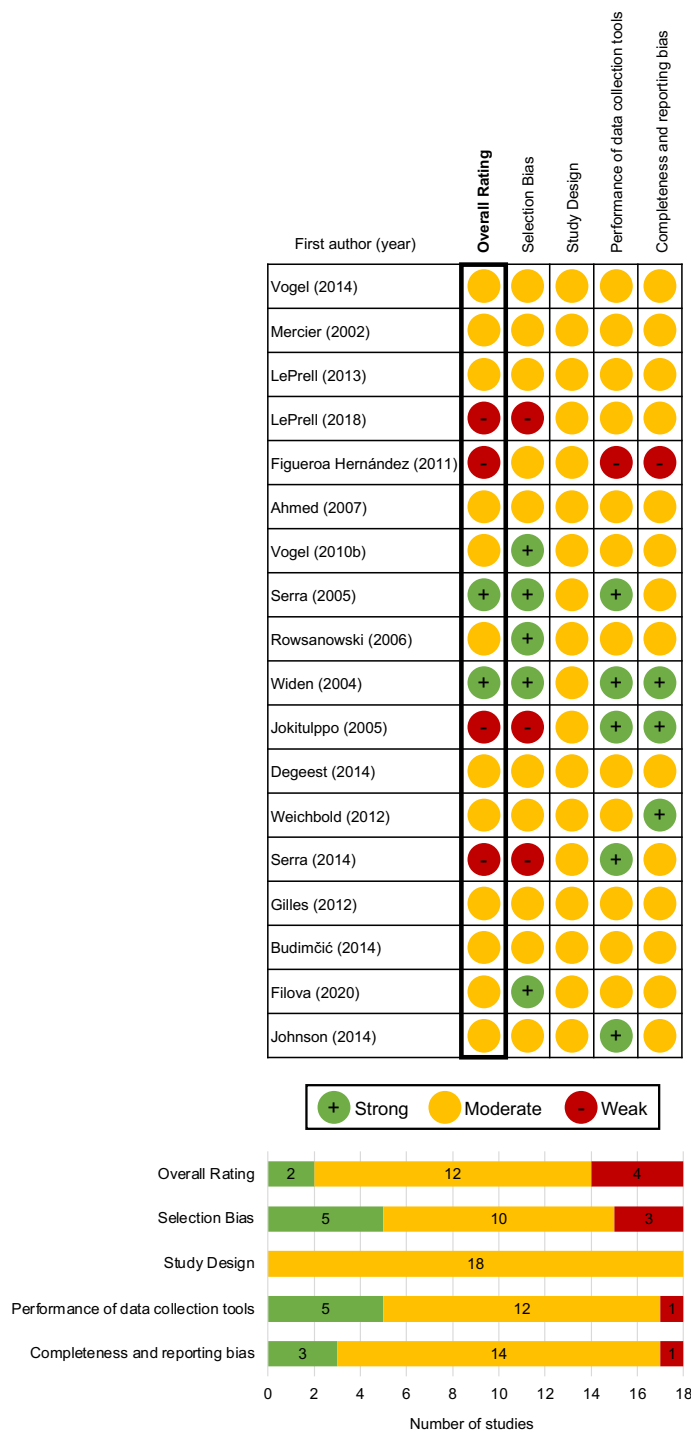

Note. Studies were assigned an overall rating of **weak** if they were ranked as weak in ≥1 category, **moderate** if they had 0 weak ratings and <2 strong ratings, and **strong** if they had 0 weak ratings and ≥2 strong ratings.
